# Supplementary material for: Sequestration and biosynthesis of cyanogenic glucosides in passion vine butterflies and consequences for the diversification of their host plants
Source: PubMed Central journal article supplement (PMC6509390; doi:10.1002/ece3.5062), 2019-04-13

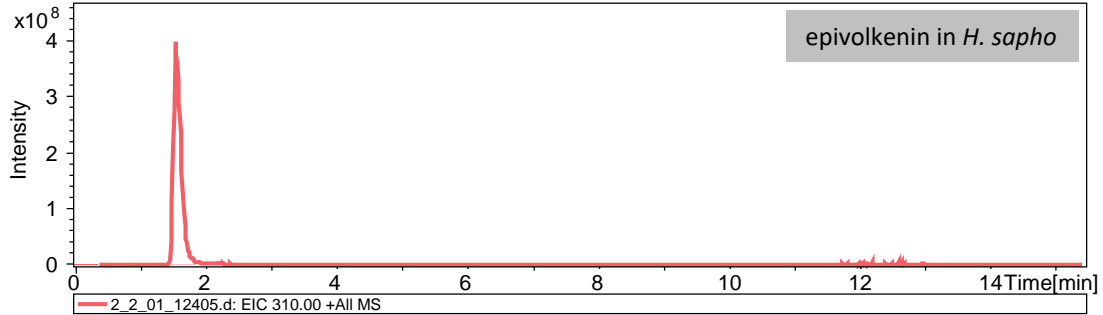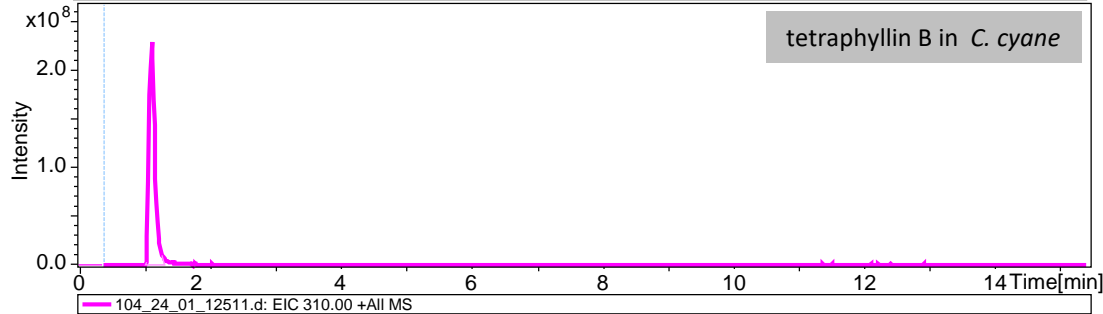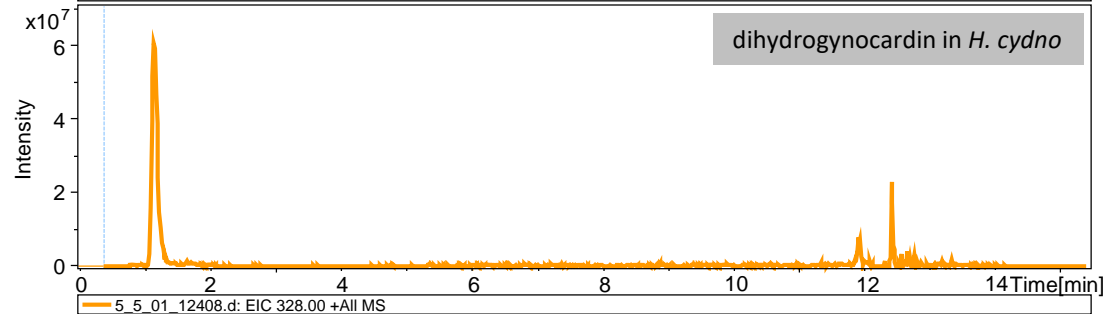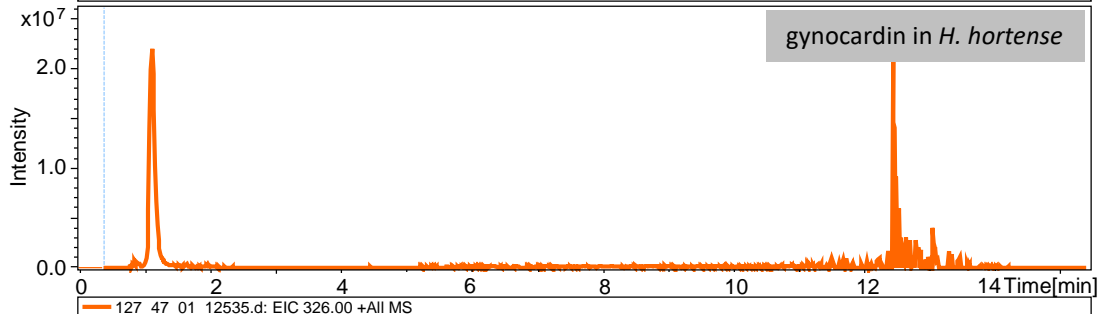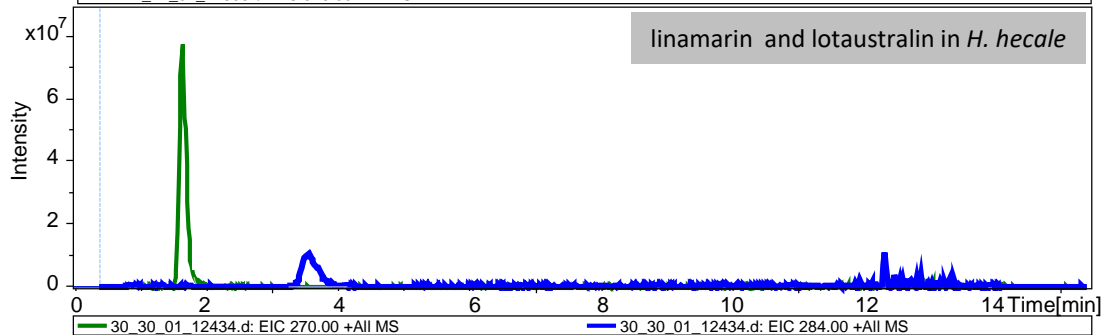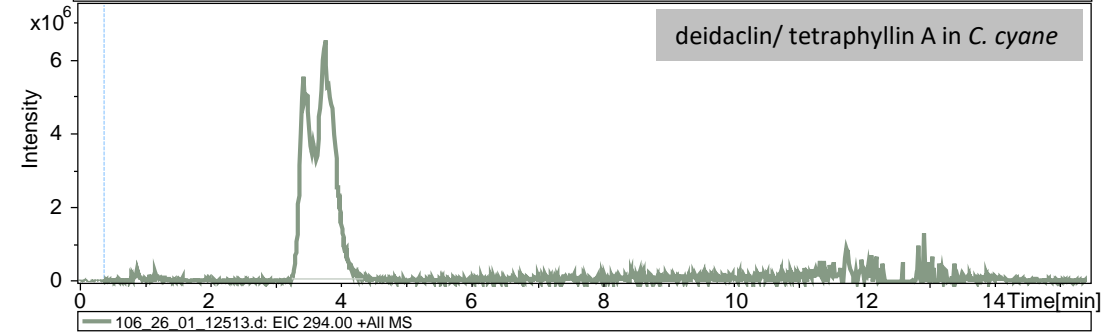

Supplement: ECE3-9-5079-s001.pdf [file ECE3-9-5079-s001.pdf]
