# Supplementary material for: Sequestration and biosynthesis of cyanogenic glucosides in passion vine butterflies and consequences for the diversification of their host plants
Source: PubMed Central journal article supplement (PMC6509390; doi:10.1002/ece3.5062), 2019-04-13
Supplement: ECE3-9-5079-s002.pdf [file ECE3-9-5079-s002.pdf]

**Table S1.** Means of total CNGlc concentration in heliconiines and *Cethosia cyane*

| <b>Species</b>                | <b>Abbrev.</b> | <b>N</b> | <b>CT</b> | <b>sd</b> | <b>se</b> | <b>ci</b> |
|-------------------------------|----------------|----------|-----------|-----------|-----------|-----------|
| <i>Cethosia cyane</i>         | Ccya           | 9        | 4.61      | 1.23      | 0.41      | 0.95      |
| <i>Dryas iulia</i>            | Diul           | 8        | 2.66      | 0.72      | 0.26      | 0.60      |
| <i>Dryadula phaethusa</i>     | Dpha           | 7        | 2.30      | 0.85      | 0.32      | 0.79      |
| <i>Dione juno</i>             | Djun           | 5        | 2.44      | 1.09      | 0.49      | 1.36      |
| <i>Agraulis vanillae</i>      | Avan           | 6        | 3.58      | 1.39      | 0.57      | 1.46      |
| <i>Eueides isabella</i>       | Eisa           | 3        | 4.17      | 1.18      | 0.68      | 2.93      |
| <i>Heliconius doris</i>       | Hdor           | 7        | 4.16      | 1.34      | 0.51      | 1.24      |
| <i>Heliconius atthis</i>      | Hatt           | 5        | 4.61      | 1.68      | 0.75      | 2.09      |
| <i>Heliconius ismenius</i>    | Hism           | 8        | 4.09      | 1.06      | 0.38      | 0.89      |
| <i>Heliconius hecale</i>      | Hhec           | 9        | 3.36      | 1.71      | 0.57      | 1.32      |
| <i>Heliconius cydno</i>       | Hcyd           | 10       | 2.67      | 1.03      | 0.33      | 0.74      |
| <i>Heliconius melpomene</i>   | Hmel           | 10       | 2.56      | 1.37      | 0.43      | 0.98      |
| <i>Heliconius erato</i>       | Hera           | 10       | 3.08      | 1.82      | 0.58      | 1.30      |
| <i>Heliconius hortenses</i>   | Hhor           | 4        | 3.41      | 0.84      | 0.42      | 1.33      |
| <i>Heliconius charithonia</i> | Hcha           | 10       | 3.63      | 1.89      | 0.60      | 1.35      |
| <i>Heliconius sara</i>        | Hsar           | 10       | 3.09      | 1.18      | 0.37      | 0.84      |
| <i>Heliconius antiochus</i>   | Hant           | 4        | 6.17      | 0.78      | 0.39      | 1.25      |
| <i>Heliconius sapho</i>       | Hsap           | 9        | 7.45      | 4.78      | 1.59      | 3.68      |
| <i>Heliconius hewitsoni</i>   | Hhew           | 10       | 3.01      | 1.56      | 0.49      | 1.11      |

N = number of replicates. CT = means total CNGlc concentration. Sd = standard deviation of the means

**Table S2.** Pairwise comparisons between total CNglc concentrations in heliconiines and *Cethosia cyane*.

|      | Ccya        | Diul        | Dpha        | Djun        | Avan        | Eisa | Hdor        | Hatt        | Hism        | Hhec        | Hcyd        | Hmel        | Hera        | Hhor        | Hcha        | Hsar        | Hant        | Hsap        | Hhew |
|------|-------------|-------------|-------------|-------------|-------------|------|-------------|-------------|-------------|-------------|-------------|-------------|-------------|-------------|-------------|-------------|-------------|-------------|------|
| Ccya | -           |             |             |             |             |      |             |             |             |             |             |             |             |             |             |             |             |             |      |
| Diul | 0.04        | -           |             |             |             |      |             |             |             |             |             |             |             |             |             |             |             |             |      |
| Dpha | <b>0.01</b> | 0.63        | -           |             |             |      |             |             |             |             |             |             |             |             |             |             |             |             |      |
| Djun | <b>0.03</b> | 0.76        | 0.90        | -           |             |      |             |             |             |             |             |             |             |             |             |             |             |             |      |
| Avan | 0.31        | 0.37        | 0.20        | 0.27        | -           |      |             |             |             |             |             |             |             |             |             |             |             |             |      |
| Eisa | 0.76        | 0.22        | 0.13        | 0.17        | 0.63        | -    |             |             |             |             |             |             |             |             |             |             |             |             |      |
| Hdor | 0.64        | 0.13        | 0.05        | 0.09        | 0.57        | 0.97 | -           |             |             |             |             |             |             |             |             |             |             |             |      |
| Hatt | 0.96        | 0.08        | <b>0.04</b> | 0.07        | 0.40        | 0.80 | 0.71        | -           |             |             |             |             |             |             |             |             |             |             |      |
| Hism | 0.62        | 0.13        | 0.05        | 0.09        | 0.58        | 0.95 | 0.97        | 0.69        | -           |             |             |             |             |             |             |             |             |             |      |
| Hhec | 0.12        | 0.56        | 0.30        | 0.40        | 0.69        | 0.40 | 0.30        | 0.20        | 0.30        | -           |             |             |             |             |             |             |             |             |      |
| Hcyd | <b>0.02</b> | 0.96        | 0.66        | 0.78        | 0.31        | 0.19 | 0.10        | 0.06        | 0.09        | 0.50        | -           |             |             |             |             |             |             |             |      |
| Hmel | <b>0.01</b> | 0.78        | 0.83        | 0.94        | 0.23        | 0.14 | 0.06        | <b>0.04</b> | 0.06        | 0.36        | 0.81        | -           |             |             |             |             |             |             |      |
| Hera | 0.06        | 0.75        | 0.42        | 0.54        | 0.51        | 0.29 | 0.18        | 0.12        | 0.19        | 0.77        | 0.68        | 0.52        | -           |             |             |             |             |             |      |
| Hhor | 0.32        | 0.46        | 0.28        | 0.35        | 0.93        | 0.60 | 0.55        | 0.39        | 0.57        | 0.79        | 0.42        | 0.32        | 0.61        | -           |             |             |             |             |      |
| Hcha | 0.21        | 0.34        | 0.16        | 0.24        | 0.95        | 0.56 | 0.48        | 0.31        | 0.49        | 0.70        | 0.27        | 0.18        | 0.49        | 0.97        | -           |             |             |             |      |
| Hsar | 0.09        | 0.64        | 0.34        | 0.46        | 0.60        | 0.35 | 0.24        | 0.15        | 0.23        | 0.89        | 0.57        | 0.43        | 0.86        | 0.70        | 0.60        | -           |             |             |      |
| Hant | 0.24        | <b>0.01</b> | <b>0.00</b> | <b>0.01</b> | 0.06        | 0.23 | 0.13        | 0.27        | 0.12        | <b>0.02</b> | <b>0.01</b> | <b>0.00</b> | <b>0.01</b> | 0.08        | <b>0.04</b> | 0.01        | -           |             |      |
| Hsap | <b>0.04</b> | <b>0.00</b> | <b>0.00</b> | <b>0.00</b> | <b>0.01</b> | 0.08 | <b>0.02</b> | 0.07        | <b>0.01</b> | <b>0.00</b> | <b>0.00</b> | <b>0.00</b> | <b>0.00</b> | <b>0.01</b> | <b>0.00</b> | <b>0.00</b> | 0.62        | -           |      |
| Hhew | <b>0.03</b> | 0.90        | 0.54        | 0.66        | 0.41        | 0.24 | 0.13        | 0.09        | 0.13        | 0.63        | 0.85        | 0.66        | 0.84        | 0.51        | 0.37        | 0.71        | <b>0.01</b> | <b>0.00</b> | -    |

Differences statistically significant are written in bold.

**Table S3.** Pairwise comparisons between concentration of biosynthesized aliphatic CNgls and sequestered cyclopentanyl CNgls in heliconiines and *Cethosia cyane*.

|      | Ccya        | Diul        | Dpha        | Djun        | Avan        | Eisa        | Hdor        | Hatt        | Hism        | Hhec        | Hcyd        | Hmel        | Hera        | Hhor        | Hcha        | Hsar        | Hant        | Hsap        | Hhew        |             |
|------|-------------|-------------|-------------|-------------|-------------|-------------|-------------|-------------|-------------|-------------|-------------|-------------|-------------|-------------|-------------|-------------|-------------|-------------|-------------|-------------|
| Ccya | -           | <b>0.00</b> | <b>0.00</b> | <b>0.00</b> | <b>0.00</b> | <b>0.00</b> | <b>0.00</b> | <b>0.00</b> | <b>0.00</b> | <b>0.00</b> | <b>0.00</b> | <b>0.00</b> | <b>0.00</b> | <b>0.00</b> | <b>0.00</b> | <b>0.00</b> | <b>0.00</b> | <b>0.00</b> | <b>0.00</b> |             |
| Diul | <b>0.00</b> | -           | 0.98        | 0.98        | <b>0.02</b> | 0.99        | 0.98        | 0.98        | 0.19        | 0.13        | <b>0.02</b> | <b>0.04</b> | 0.06        | 0.38        | 0.99        | <b>0.03</b> | <b>0.00</b> | <b>0.00</b> | <b>0.00</b> |             |
| Dpha | <b>0.00</b> | 0.70        | -           | 1.00        | <b>0.02</b> | 1.00        | 1.00        | 1.00        | 0.22        | 0.16        | <b>0.02</b> | 0.05        | <b>0.04</b> | 0.36        | 1.00        | <b>0.01</b> | <b>0.00</b> | <b>0.00</b> | <b>0.00</b> |             |
| Djun | <b>0.00</b> | 0.96        | 0.75        | -           | <b>0.04</b> | 1.00        | 1.00        | 1.00        | 0.28        | 0.21        | <b>0.04</b> | 0.09        | 0.06        | 0.41        | 1.00        | <b>0.03</b> | <b>0.00</b> | <b>0.00</b> | <b>0.00</b> |             |
| Avan | <b>0.01</b> | 0.55        | 0.77        | 0.70        | -           | 0.08        | <b>0.02</b> | <b>0.04</b> | 0.22        | 0.53        | 0.98        | 0.83        | <b>0.00</b> | <b>0.02</b> | <b>0.01</b> | <b>0.00</b> | <b>0.00</b> | <b>0.00</b> | <b>0.00</b> |             |
| Eisa | <b>0.00</b> | 0.40        | 0.27        | 0.38        | 0.18        | -           | 1.00        | 1.00        | 0.42        | 0.35        | 0.10        | 0.18        | 0.13        | 0.53        | 1.00        | 0.07        | <b>0.00</b> | <b>0.00</b> | <b>0.01</b> |             |
| Hdor | <b>0.00</b> | 0.20        | 0.09        | 0.22        | 0.06        | 0.76        | -           | 1.00        | 0.21        | 0.16        | <b>0.02</b> | 0.05        | <b>0.03</b> | 0.36        | 1.00        | <b>0.01</b> | <b>0.00</b> | <b>0.00</b> | <b>0.00</b> |             |
| Hatt | <b>0.00</b> | 0.18        | 0.15        | 0.18        | 0.08        | 0.62        | 0.23        | -           | 0.28        | 0.22        | <b>0.04</b> | 0.09        | 0.06        | 0.41        | 1.00        | <b>0.03</b> | <b>0.00</b> | <b>0.00</b> | <b>0.00</b> |             |
| Hism | <b>0.00</b> | 0.30        | 0.44        | 0.31        | 0.23        | 0.32        | 0.07        | 0.38        | -           | 0.59        | 0.25        | 0.40        | <b>0.01</b> | 0.36        | 0.16        | <b>0.00</b> | <b>0.00</b> | <b>0.00</b> | <b>0.00</b> |             |
| Hhec | <b>0.00</b> | 0.27        | 0.62        | 0.36        | 0.62        | 0.10        | <b>0.02</b> | 0.05        | 0.26        | -           | 0.71        | 0.94        | <b>0.00</b> | 0.09        | 0.10        | <b>0.00</b> | <b>0.00</b> | <b>0.00</b> | <b>0.00</b> |             |
| Hcyd | <b>0.01</b> | 0.14        | 0.34        | 0.24        | 0.55        | <b>0.05</b> | <b>0.00</b> | <b>0.01</b> | 0.07        | 0.54        | -           | 0.96        | <b>0.00</b> | <b>0.02</b> | <b>0.01</b> | <b>0.00</b> | <b>0.00</b> | <b>0.00</b> | <b>0.00</b> |             |
| Hmel | <b>0.01</b> | 0.09        | 0.27        | 0.17        | 0.38        | <b>0.03</b> | <b>0.00</b> | <b>0.01</b> | 0.08        | 0.57        | 0.78        | -           | <b>0.00</b> | 0.05        | <b>0.03</b> | <b>0.00</b> | <b>0.00</b> | <b>0.00</b> | <b>0.00</b> |             |
| Hera | <b>0.01</b> | 0.09        | 0.26        | 0.17        | 0.38        | <b>0.03</b> | <b>0.00</b> | <b>0.01</b> | 0.07        | 0.54        | 0.79        | 1.00        | -           | 0.07        | 0.02        | 0.95        | <b>0.01</b> | <b>0.00</b> | 0.23        |             |
| Hhor | <b>0.00</b> | 0.57        | 0.75        | 0.55        | 0.47        | 0.38        | 0.15        | 0.37        | 0.89        | 0.53        | 0.24        | 0.24        | 0.23        | -           | 0.33        | <b>0.04</b> | <b>0.00</b> | <b>0.00</b> | <b>0.01</b> |             |
| Hcha | <b>0.00</b> | 0.10        | 0.20        | 0.13        | 0.10        | 0.17        | <b>0.02</b> | 0.26        | 0.66        | 0.16        | <b>0.03</b> | <b>0.04</b> | <b>0.04</b> | 0.57        | -           | <b>0.01</b> | <b>0.00</b> | <b>0.00</b> | <b>0.00</b> |             |
| Hsar | <b>0.01</b> | 0.23        | 0.44        | 0.37        | 0.77        | 0.07        | <b>0.01</b> | <b>0.02</b> | 0.09        | 0.55        | 0.84        | 0.53        | 0.53        | 0.29        | <b>0.03</b> | -           | <b>0.03</b> | <b>0.00</b> | 0.48        |             |
| Hant | 0.48        | <b>0.00</b> | <b>0.00</b> | <b>0.00</b> | <b>0.00</b> | <b>0.00</b> | <b>0.00</b> | <b>0.00</b> | <b>0.00</b> | <b>0.00</b> | <b>0.01</b> | <b>0.00</b> | <b>0.01</b> | <b>0.00</b> | <b>0.00</b> | <b>0.01</b> | -           | 0.98        | 0.21        |             |
| Hsap | 0.34        | <b>0.00</b> | <b>0.00</b> | <b>0.00</b> | <b>0.00</b> | <b>0.00</b> | <b>0.00</b> | <b>0.00</b> | <b>0.00</b> | <b>0.00</b> | <b>0.00</b> | <b>0.00</b> | <b>0.00</b> | <b>0.00</b> | <b>0.00</b> | <b>0.00</b> | <b>0.00</b> | 1.00        | -           | <b>0.03</b> |
| Hhew | 0.33        | <b>0.00</b> | <b>0.00</b> | <b>0.00</b> | <b>0.00</b> | <b>0.00</b> | <b>0.00</b> | <b>0.00</b> | <b>0.00</b> | <b>0.00</b> | <b>0.00</b> | <b>0.00</b> | <b>0.00</b> | <b>0.00</b> | <b>0.00</b> | <b>0.00</b> | <b>0.00</b> | 1.00        | 1.00        | -           |

Differences statistically significant are written in bold.

**Table S4.** PGLS analysis of the correlation between CNglcs composition and larval-diet specialization in heliconiines.

|          | d.f | MS   | R <sup>2</sup> | F    | Z    | P-value |
|----------|-----|------|----------------|------|------|---------|
| CNglc    |     |      |                |      |      |         |
| diet     | 4   | 0.46 | 0.61           | 5.18 | 3.07 | <0.001  |
| residual | 13  | 0.08 | 0.38           |      |      |         |

**Table S5.** PGLS analysis of the correlation between biosynthesis of aliphatic CNglcs and sequestration of cyclopentenyl CNglcs in heliconiines.

|               | d.f | MS   | R <sup>2</sup> | F     | Z    | P-value |
|---------------|-----|------|----------------|-------|------|---------|
| Sequestration |     |      |                |       |      |         |
| Biosynthesis  | 1   | 1.18 | 0.73           | 43.33 | 2.22 | <0.001  |
| residual      | 16  | 0.03 | 0.27           |       |      |         |
